# Supplementary material for: Common DNA methylation dynamics in endometriod adenocarcinoma and glioblastoma suggest universal epigenomic alterations in tumorigenesis
Source: PubMed Central journal article supplement (PMC8140130; doi:10.1038/s42003-021-02094-1), 2021-05-21
Supplement: 42003_2021_2094_MOESM1_ESM.pdf [file 42003_2021_2094_MOESM1_ESM.pdf]

1 Supplementary Figures 1-5, Supplementary Tables 1 and 2, and Supplementary  
2 References

3

4 **Common DNA methylation dynamics in endometriod adenocarcinoma and**  
5 **glioblastoma suggest universal epigenomic alterations in tumorigenesis**

6

7 Jennifer A Karlow<sup>1</sup>, Benpeng Miao<sup>1,2</sup>, Xiaoyun Xing<sup>1</sup>, Ting Wang<sup>1,\*</sup>, Bo Zhang<sup>1,2,\*</sup>

8

9 \* These authors jointly supervised this work.

10 Co-corresponding author emails: [twang@wustl.edu](mailto:twang@wustl.edu) and [bzhang29@wustl.edu](mailto:bzhang29@wustl.edu)

11

12 <sup>1</sup>The Edison Family Center for Genome Sciences and Systems Biology, Department of  
13 Genetics, McDonnell Genome Institute, Washington University School of Medicine,  
14 4515 McKinley Avenue, Campus Box 8510, St. Louis, MO 63110, USA

15 <sup>2</sup>Center of Regenerative Medicine, Department of Developmental Biology, Washington  
16 University School of Medicine, 4515 McKinley Avenue, St. Louis, MO 63110, USA

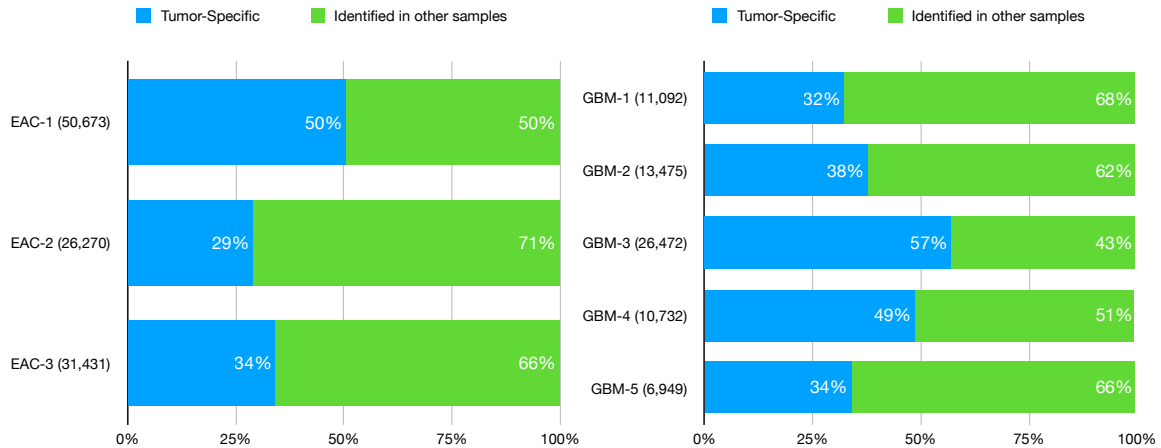

17  
18  
19  
20  
21  
22  
23  
24

**Supplementary Figure 1: DMR variability across tumors within cancer types.**

Number of DMRs identified for each tumor/normal comparison are depicted in parentheses adjacent the tumor ID. The percentage of each tumor’s DMRs that were identified in at least one other tumor/normal comparison of the same cancer type are depicted in green (“Identified in other samples”). The percentage of each tumor’s DMRs that were only identified in that tumor/normal pair for the particular cancer type are depicted in blue (“Tumor-Specific”). Left: EAC samples; Right: GBM samples.

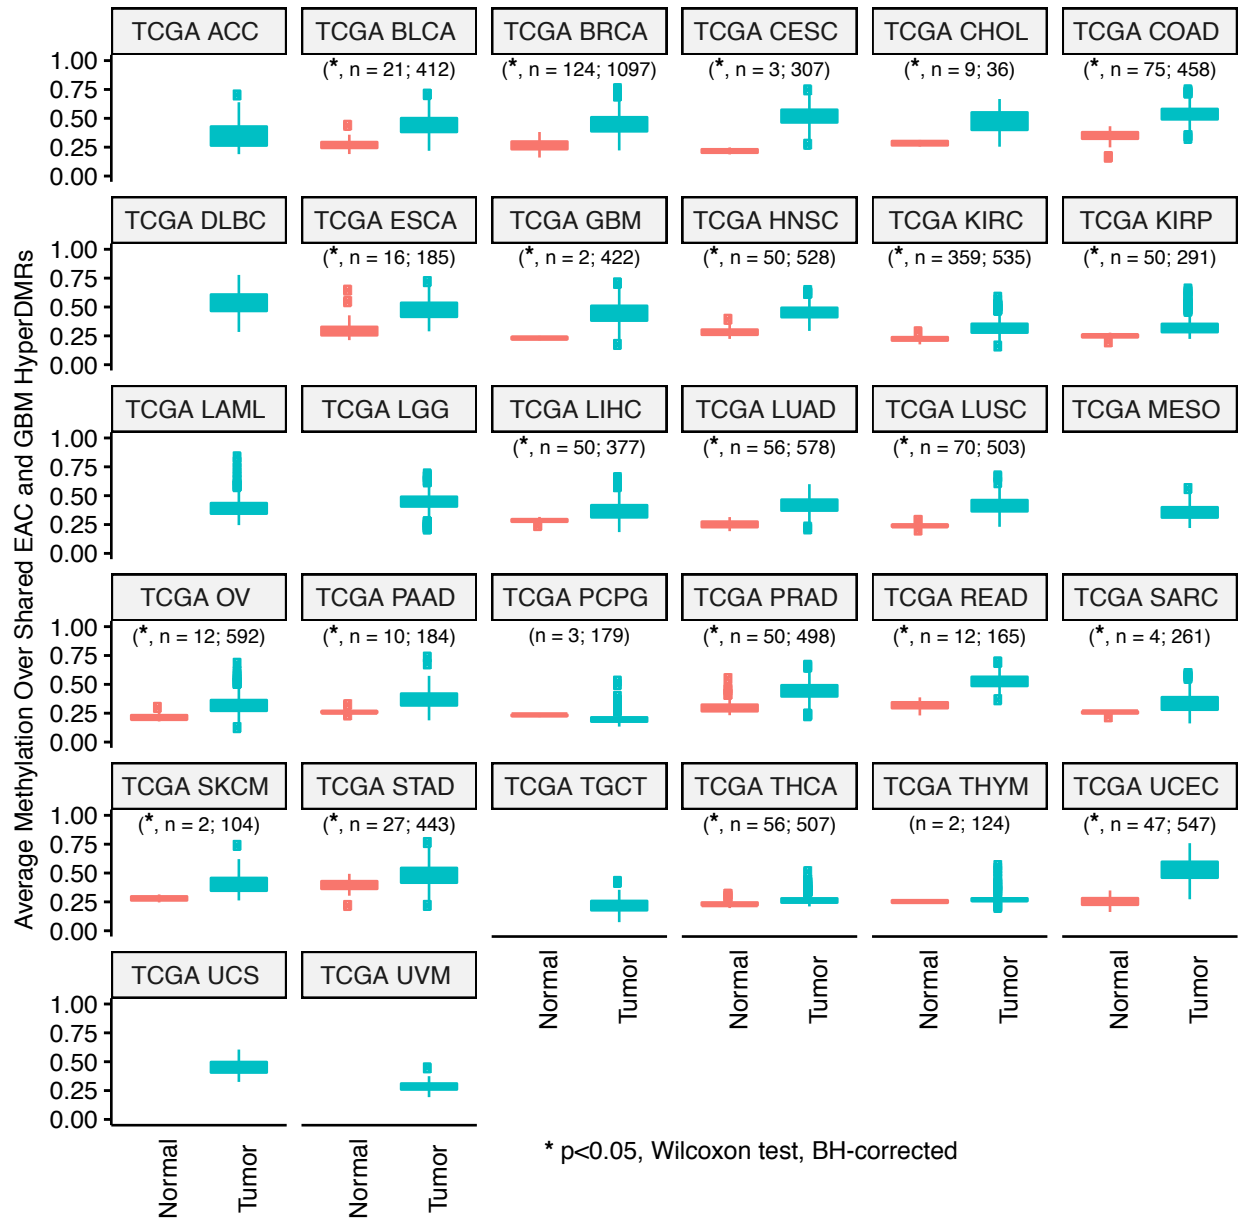

25  
 26 **Supplementary Figure 2: Methylation Levels within TCGA Samples Over Shared**  
 27 **EAC and GBM hyperDMRs.** Average methylation over TCGA CpG probes for 32  
 28 cancer types, spanning shared EAC and GBM hyperDMRs in normal (red) and tumor  
 29 (blue) samples, where data are available (n=number of normal cases; number of cancer  
 30 type cases). Significant methylation changes (all in the form of methylation gain) were  
 31 identified in 22/24 TCGA cancer types (t-tests, p < 0.05, BH corrected).

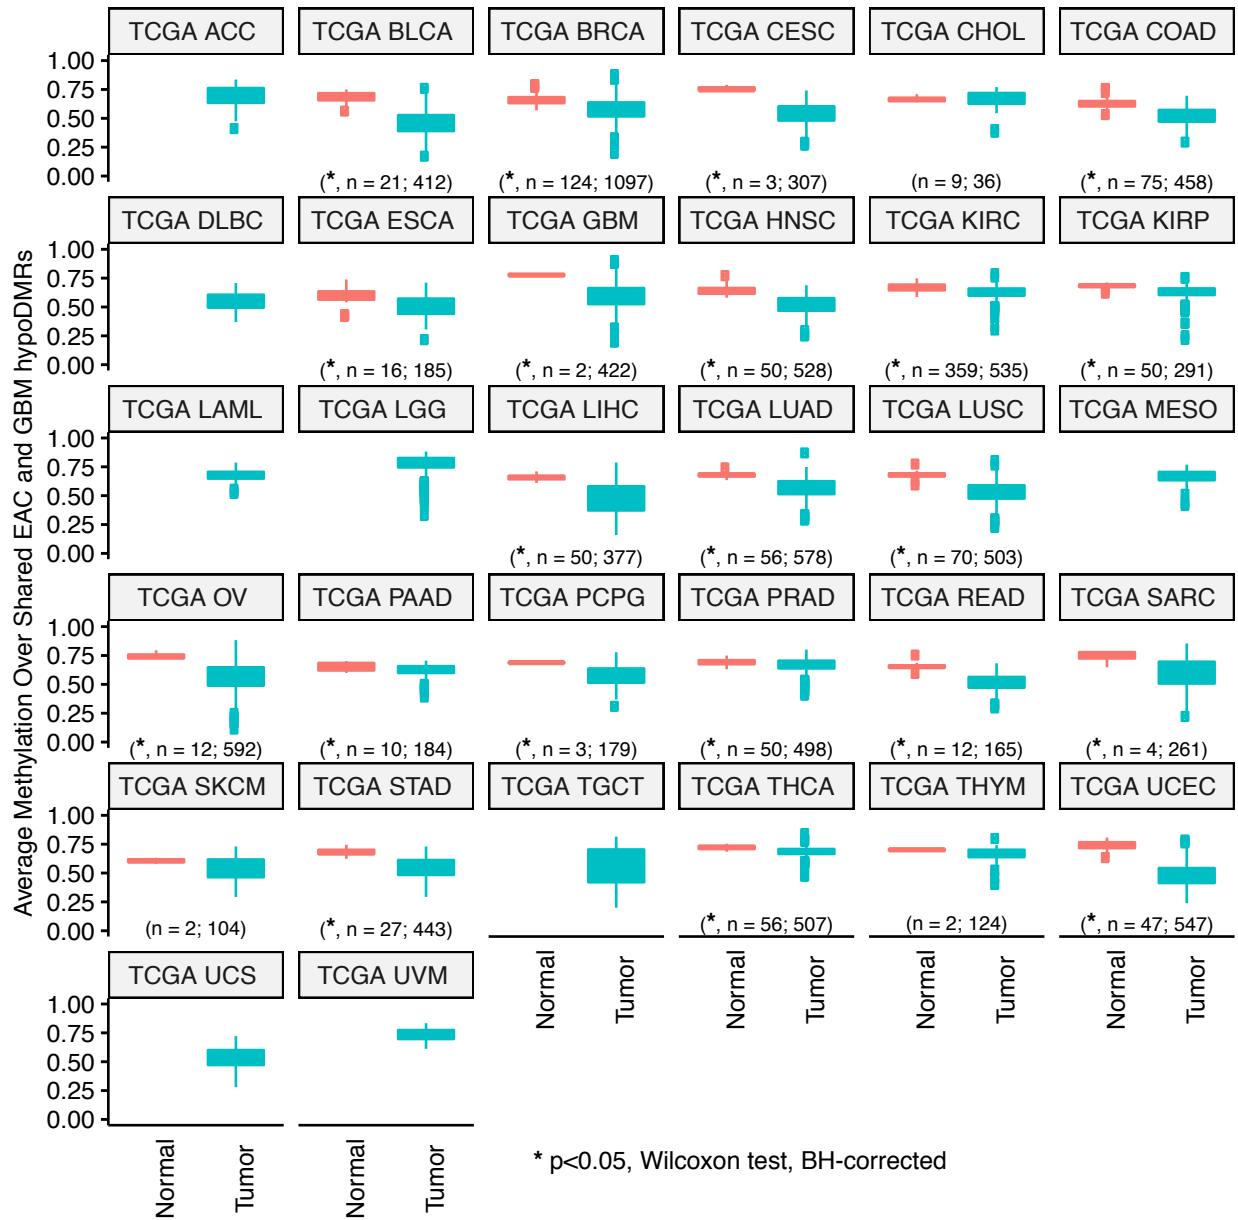

32  
 33 **Supplementary Figure 3: Methylation Levels within TCGA Samples Over Shared**  
 34 **EAC and GBM hypoDMRs.** Average methylation over TCGA CpG probes for 32  
 35 cancer types, spanning shared EAC and GBM hypoDMRs in normal (red) and tumor  
 36 (blue) samples, where data are available (n=number of normal cases; number of cancer  
 37 type cases). Significant methylation changes (all in the form of methylation loss) were  
 38 identified in 21/24 TCGA cancer types (t-tests, p<0.05, BH corrected).

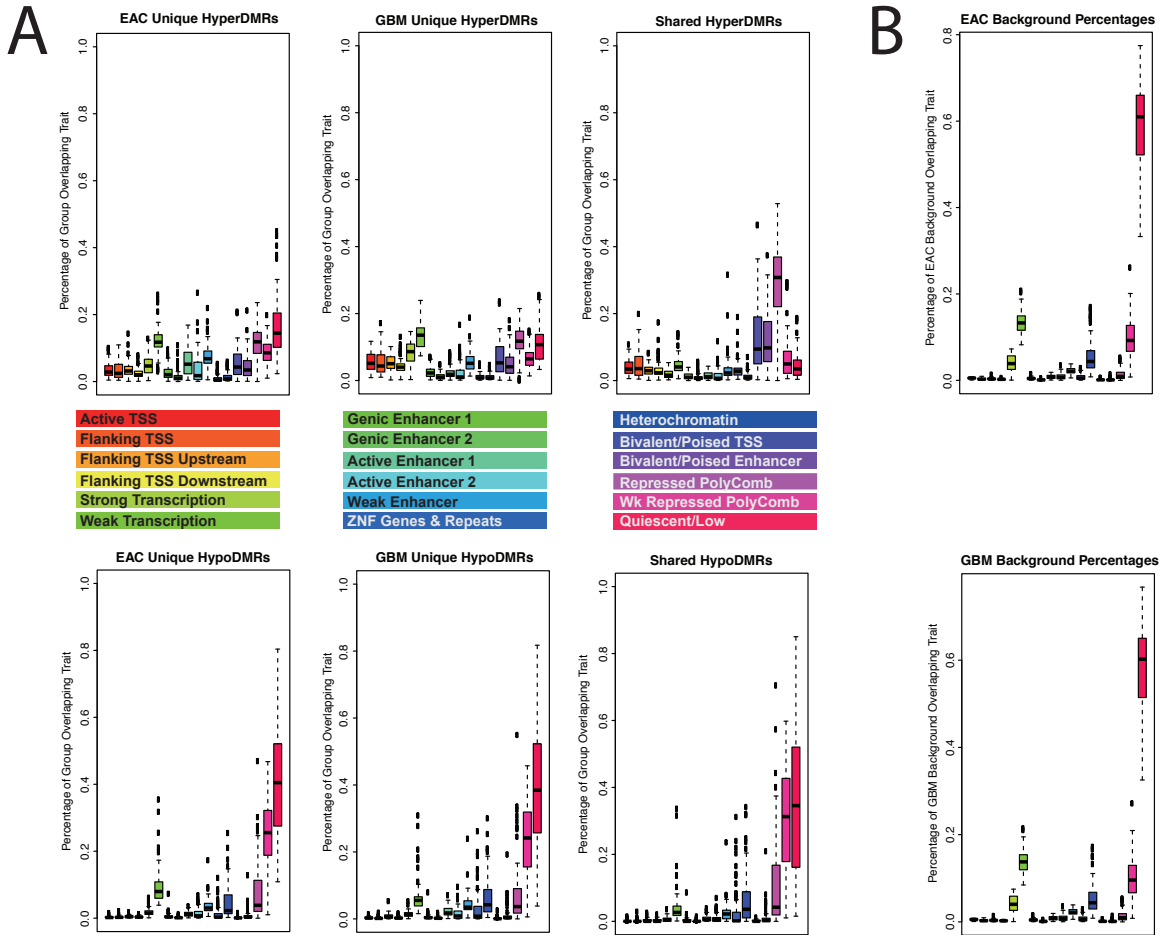

39  
40  
41  
42  
43  
44

**Supplementary Figure 4: Comparative Analysis of EAC and GBM DNA Methylation Abnormalities.** EAC and GBM DMR (A) and genomic background (B) percentage overlaps with epigenetic annotations (chromHMM 18-states) across a variety of cell and tissue types (n=80, Human Roadmap Epigenome<sup>1</sup>, see **Supplementary Data 5** for a complete list).

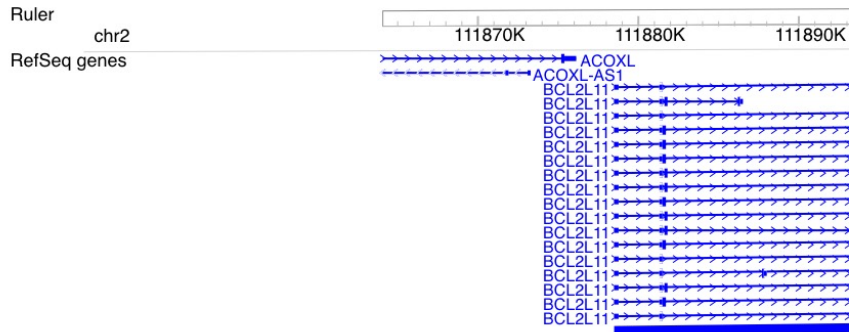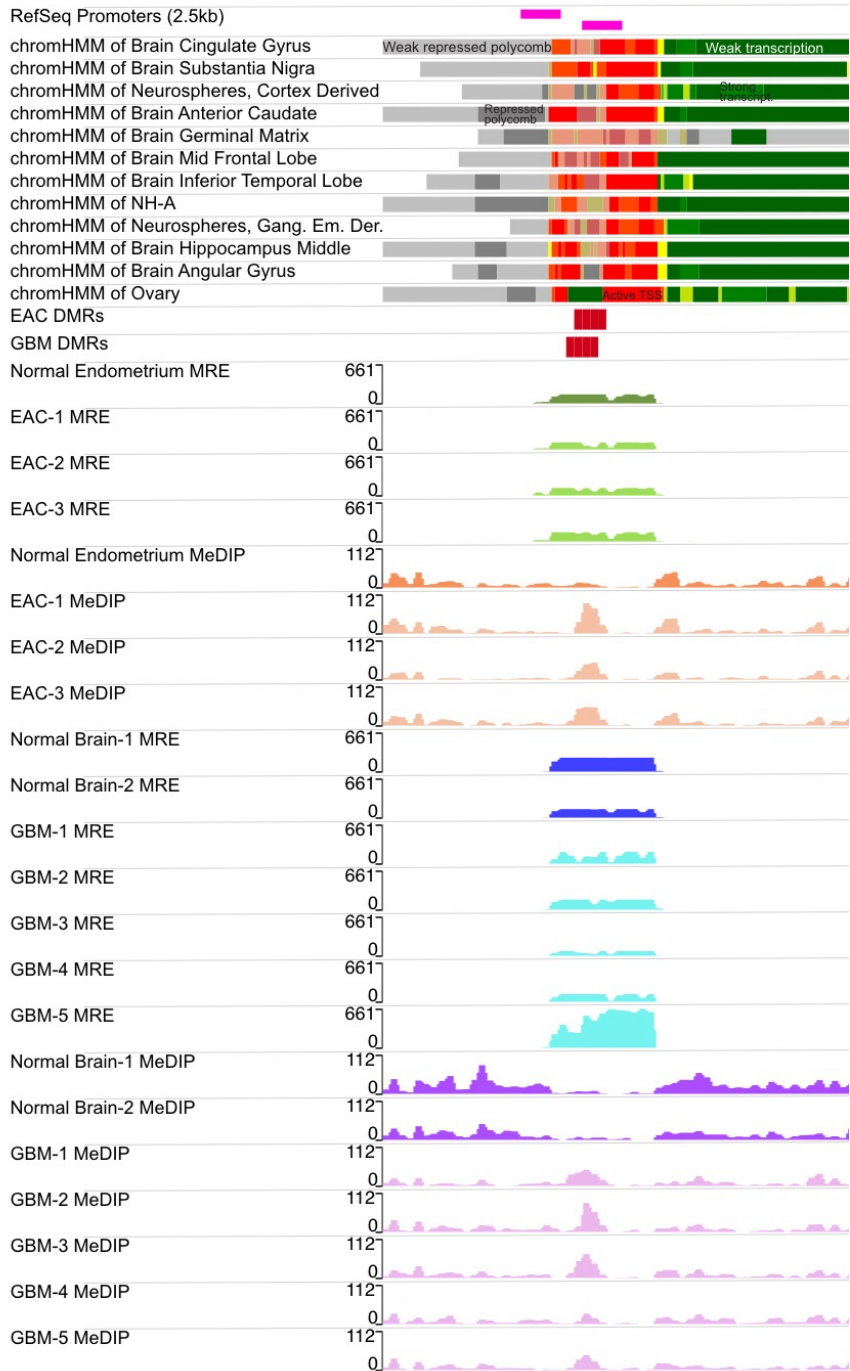

46 **Supplementary Figure 5: Browser<sup>2,3</sup> view of EAC and GBM hyperDMRs overlapping**  
47 ***BCL2L11* regulatory regions**

48 First panel displays RefSeq gene locations across genomic coordinates (shown in ruler  
49 at the top), focused in on the *BCL2L11* promoter and surrounding regions. The second  
50 panel displays the locations of RefSeq promoters, defined as the regions spanning 2kb  
51 upstream to 500bp downstream each transcription start site (TSS). The proceeding 12  
52 tracks display predicted chromatin states for various cell and tissue types surrounding the  
53 *BCL2L11* promoter, provided by the Roadmap Epigenomics Consortium<sup>1</sup>. A full catalogue  
54 of color IDs has been made available<sup>1</sup>. The next 2 tracks display the locations of EAC  
55 and GBM DMRs, respectively (red = hyperDMR; blue = hypoDMR). The following track  
56 displays normal endometrium MRE-seq data, and the next 3 tracks display MRE-seq data  
57 across 3 EAC samples. Similarly, next is a track displaying normal endometrium MeDIP-  
58 seq data followed by MeDIP-seq data tracks for the same 3 EAC samples. Finally, in a  
59 similar manner, 2 normal brain MRE-seq tracks are followed by 5 GBM MRE-seq tracks,  
60 and 2 normal brain MeDIP-seq tracks are followed by 5 GBM MeDIP-seq tracks. (MeDIP-  
61 seq and MRE-seq tracks depict raw counts; “Gang. Em. Der.” = “Ganglion Eminence  
62 Derived”)

Supplementary Table 1: EZH2 binding enrichment within GBM hyperDMRs

|                                                   | GBM-Unique HyperDMR: | Shared GBM/EAC HyperDMRs |
|---------------------------------------------------|----------------------|--------------------------|
| Average EZH2 Signal Over DMRs                     | 16.6406              | 35.8355                  |
| Average EZH2 Signal Over Background               | 3.51367              | 3.51367                  |
| Enrichment of EZH2 Signal in DMRs Over Background | 4.73596              | 10.1989                  |

ChIP-Seq data from ENCODE's NH-A sample (GSM1003532)<sup>4</sup>



Supplementary Table 2: Summary of DMRs containing CpG probes in the Infinium 450K and 850K platforms

|     | DMRs in cancer  | Total | Infinium 450K |            | Infinium 850K |            |
|-----|-----------------|-------|---------------|------------|---------------|------------|
|     |                 |       | DMRs Covered  | Percentage | DMRs Covered  | Percentage |
| GBM | Hypermethylated | 10178 | 7013          | 68.90%     | 7595          | 74.62%     |
|     | Hypomethylated  | 4494  | 829           | 18.45%     | 1483          | 33.00%     |
|     | Total           | 14672 | 7842          | 53.45%     | 9078          | 61.87%     |
| EAC | Hypermethylated | 18278 | 10706         | 58.57%     | 12423         | 67.97%     |
|     | Hypomethylated  | 8712  | 2102          | 24.13%     | 3272          | 37.56%     |
|     | Total           | 26990 | 12808         | 47.45%     | 15695         | 58.15%     |

65 **Supplementary References**

- 66 1. Roadmap Epigenomics Consortium, Kundaje A, Meuleman W, et al. Integrative  
67 analysis of 111 reference human epigenomes. *Nature*. 2015;518:317-329.  
68 doi:10.1038/nature14248
- 69 2. Zhou X, Maricque B, Xie M, et al. The human epigenome browser at Washington  
70 University. *Nat Methods*. 2011;8(12):989-990. doi:10.1038/nmeth.1772
- 71 3. Li D, Hsu S, Purushotham D, Sears RL, Wang T. WashU Epigenome Browser  
72 update 2019. *Nucleic Acids Res*. 2019;47(W1):W158-W165.  
73 doi:10.1093/nar/gkz348
- 74 4. Dunham I, Kundaje A, Aldred SF, et al. An integrated encyclopedia of DNA  
75 elements in the human genome. *Nature*. 2012;489(7414):57-74.  
76 doi:10.1038/nature11247
- 77 5. Haeussler M, Zweig AS, Tyner C, et al. The UCSC Genome Browser database:  
78 2019 update. *Nucleic Acids Res*. 2019;47(D1):D853-D858.  
79 doi:10.1093/nar/gky1095
- 80 6. Zhao M, Sun J, Zhao Z. TSGene: A web resource for tumor suppressor genes.  
81 *Nucleic Acids Res*. 2013;41(D1):D970-976. doi:10.1093/nar/gks937
- 82 7. Zhao M, Kim P, Mitra R, Zhao J, Zhao Z. TSGene 2.0: An updated literature-  
83 based knowledgebase for Tumor Suppressor Genes. *Nucleic Acids Res*.  
84 2016;44(D1):D1023-D1031. doi:10.1093/nar/gkv1268
- 85 8. McLean CY, Bristor D, Hiller M, et al. GREAT improves functional interpretation  
86 of cis-regulatory regions. *Nat Biotechnol*. 2010;28(5):495-501.  
87 doi:https://doi.org/10.1038/nbt.1630
- 88 9. Visel A, Minovitsky S, Dubchak I, Pennacchio LA. VISTA Enhancer Browser - A  
89 database of tissue-specific human enhancers. *Nucleic Acids Res*.  
90 2007;35(suppl\_1):D88-D92. doi:10.1093/nar/gkl822
