# Supplementary material for: Common DNA methylation dynamics in endometriod adenocarcinoma and glioblastoma suggest universal epigenomic alterations in tumorigenesis
Source: PubMed Central journal article supplement (PMC8140130; doi:10.1038/s42003-021-02094-1), 2021-05-21
Supplement: 42003_2021_2094_MOESM2_ESM.pdf [file 42003_2021_2094_MOESM2_ESM.pdf]

## Descriptions of Additional Supplementary Files

### **Supplementary Data 1**

**Description:** Tumor suppressor gene DMR overlap analysis.

### **Supplementary Data 2**

**Description:** Tumor suppressor genes with core promoter hyperDMRs in both EAC and GBM.

### **Supplementary Data 3**

**Description:** Tumor suppressor gene promoter and/or enhancer overlaps with EAC and GBM hyperDMRs. The full list of 1217 tumor suppressor genes (TSGs) analyzed in this study<sup>6,7</sup> are displayed, along with any relevant aliases. A value of 1 is given in the 3<sup>rd</sup> and 4<sup>th</sup> column if the gene's promoter or enhancer, respectively, overlaps with the hyperDMR set (1<sup>st</sup> tab: EAC hyperDMR overlaps, 2<sup>nd</sup> tab: GBM hyperDMR overlaps). The union of all TSGs with either promoter and/or enhancer overlaps to the hyperDMR set is given to the right. In the case of EAC hyperDMRs, two TSGs with regulatory regions overlapping DMRs (*BRINP1* and *CCAR2*) had the same alias: *DBC1*. Since the expression data was associated with the alias, *BRINP1* and *CCAR2* were replaced by *DBC1* on the right. TSGs without expression data are highlighted in orange.

### **Supplementary Data 4**

**Description:** GREAT<sup>8</sup> GO Biological Processes significantly enriched terms for DMRs overlapping active enhancers outside of promoters (ceDMRs). Terms reported are significant in both the binomial and hypergenometric tests (BinomFDRQ $\leq$ 0.05 and HyperFDRQ $\leq$ 0.05, are within the top 500 ranked binomial test terms, and have a region fold change of 2 or greater). Tab1: EAC ce-hyperDMRs, Tab2: EAC ce-hypoDMRs, Tab3: GBM ce-hyperDMRs, Tab4: ce-GBM hypoDMRs.

### **Supplementary Data 5**

**Description:** VISTA Enhancer IDs<sup>12</sup> and Roadmap chromHMM 18-state map IDs<sup>1</sup>.
